# Supplementary material
Source: Research Square preprint supplement (doi:10.21203/rs.3.rs-9635765/v1)

*Kras/Trp53WT; Krt19-<sup>Cre</sup>*      *Kras12D/Trp53MT; Krt19-<sup>Cre</sup>*

#1 #2 #3 #4 #5 #6    #1 #2 #3 #4 #5 #6

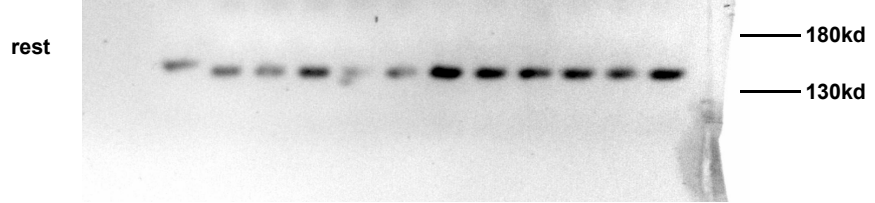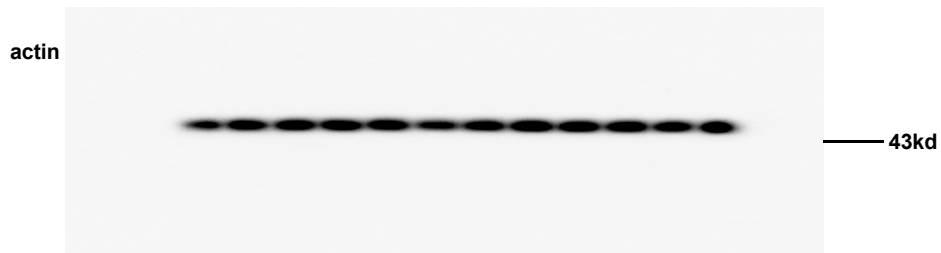

Saline DOX  
 #1 #2 #3 #4 #5 #6 #1 #2 #3 #4 #5 #6

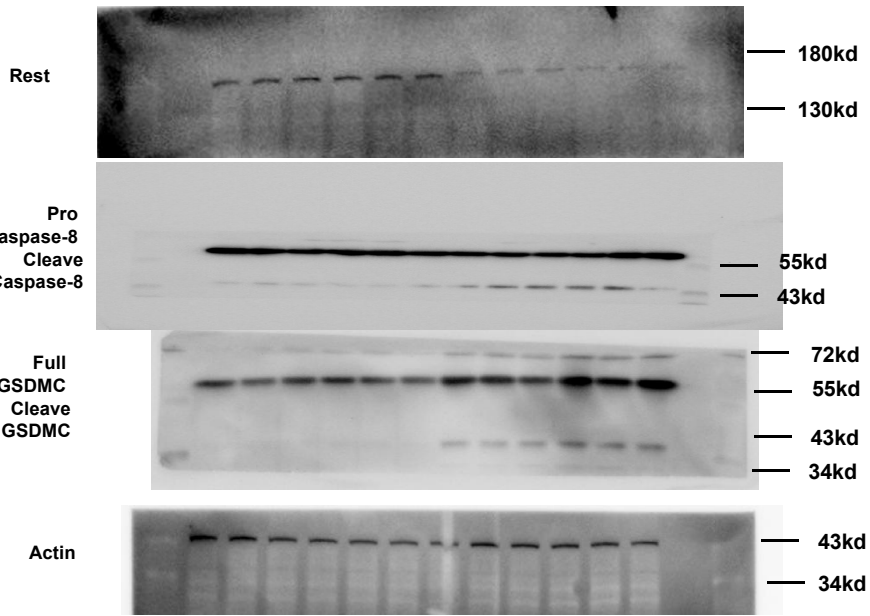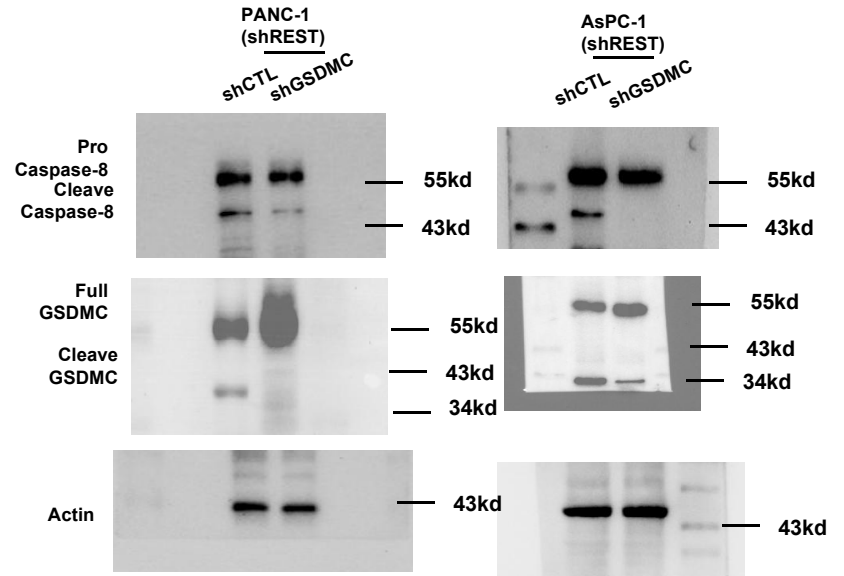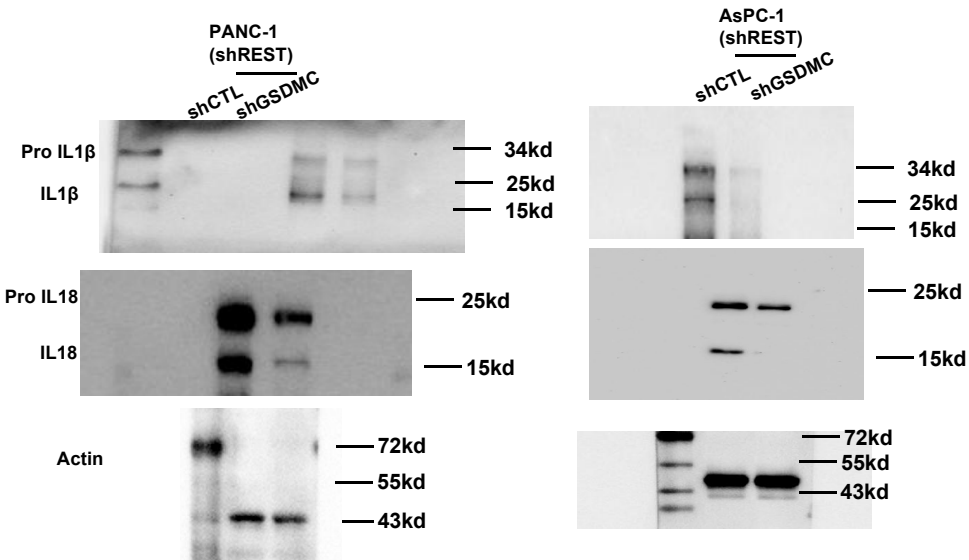

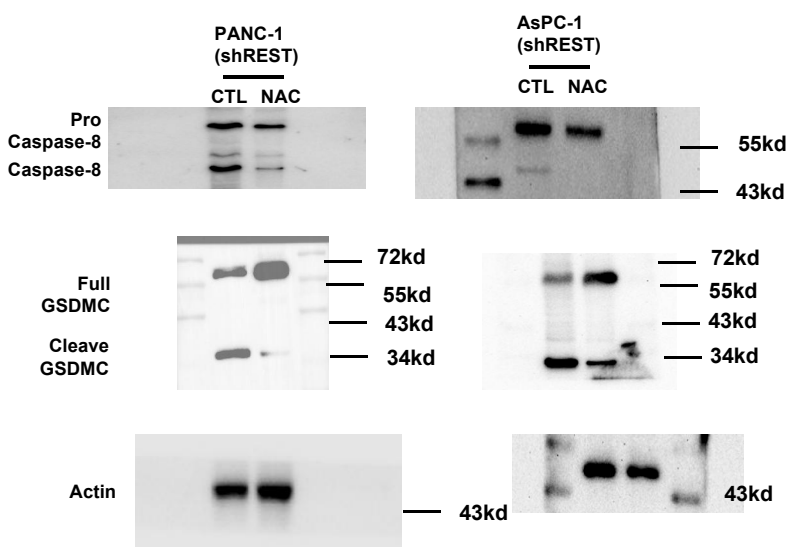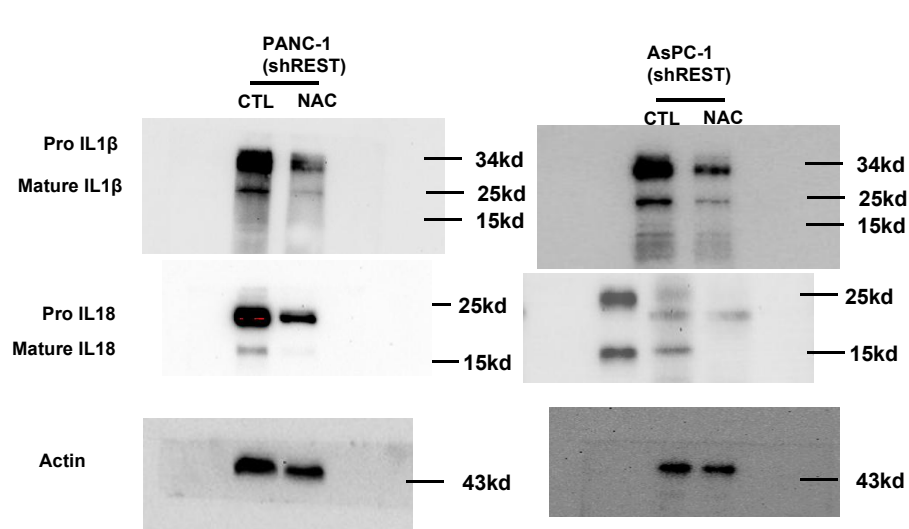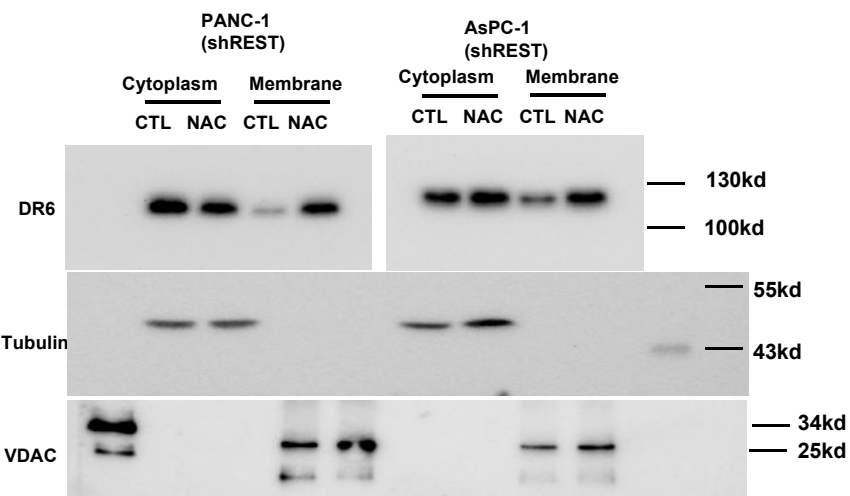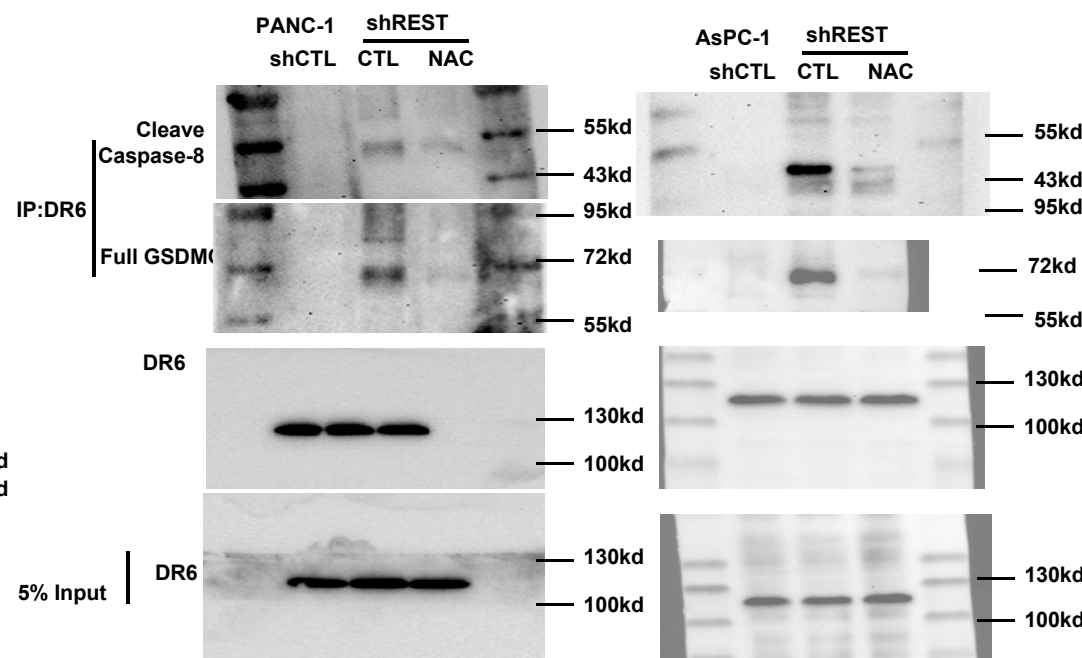

shCTL shREST shCTL shREST

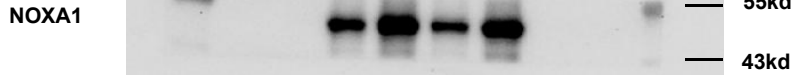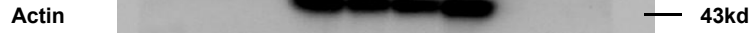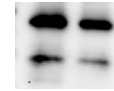

PANC-1  
(shREST)

shCTL shNOXA1

AsPC-1  
(shREST)

shCTL shNOXA1

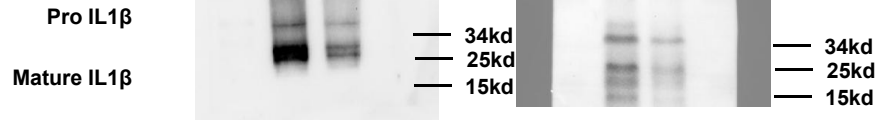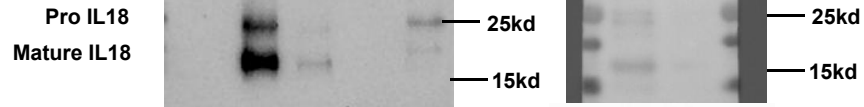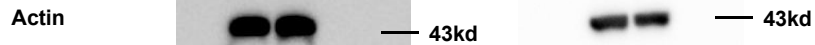

PANC-1  
(shREST)

shCTL shNOXA1

AsPC-1  
(shREST)

shCTL shNOXA1

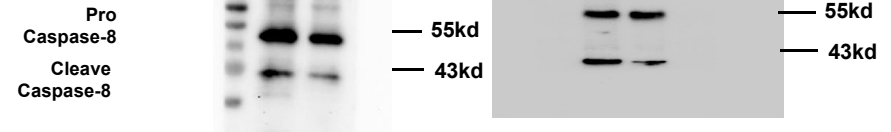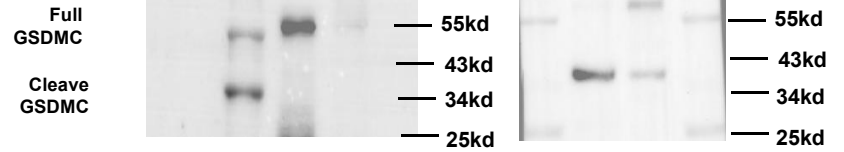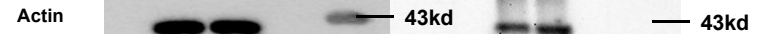

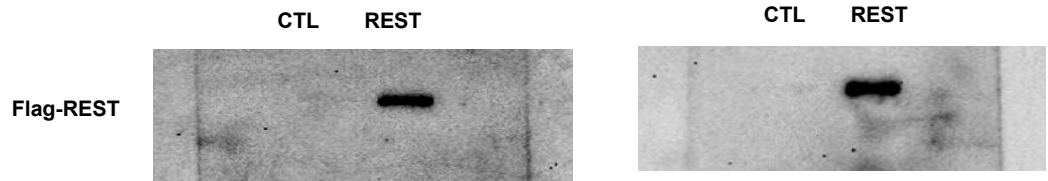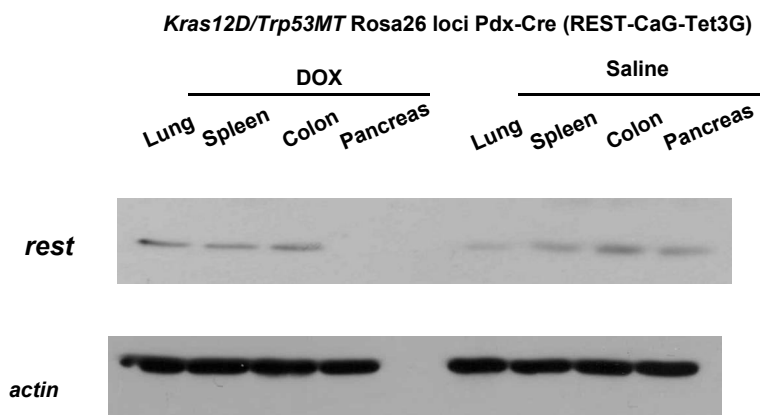

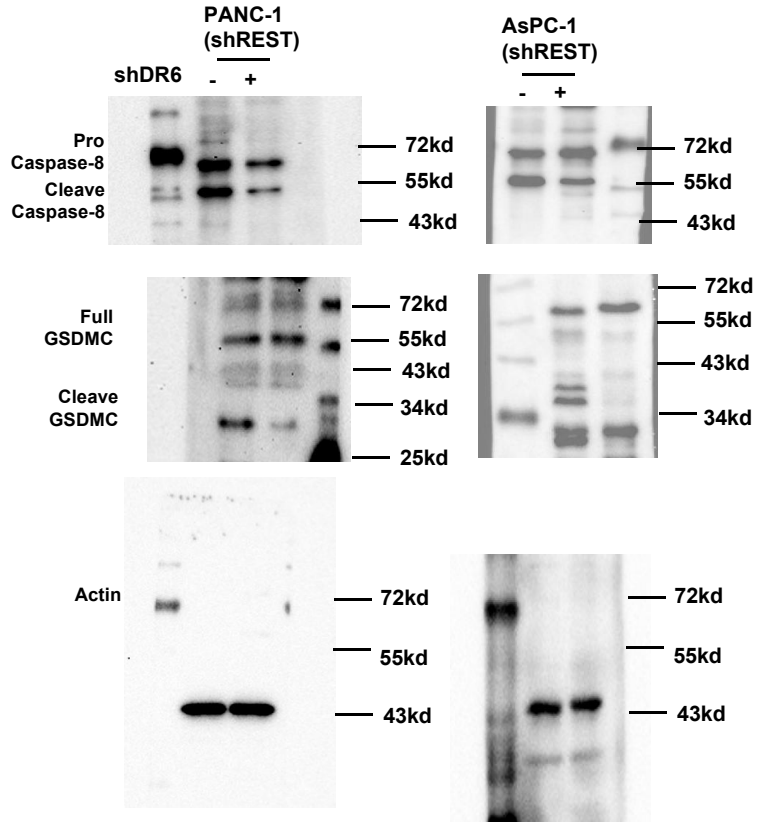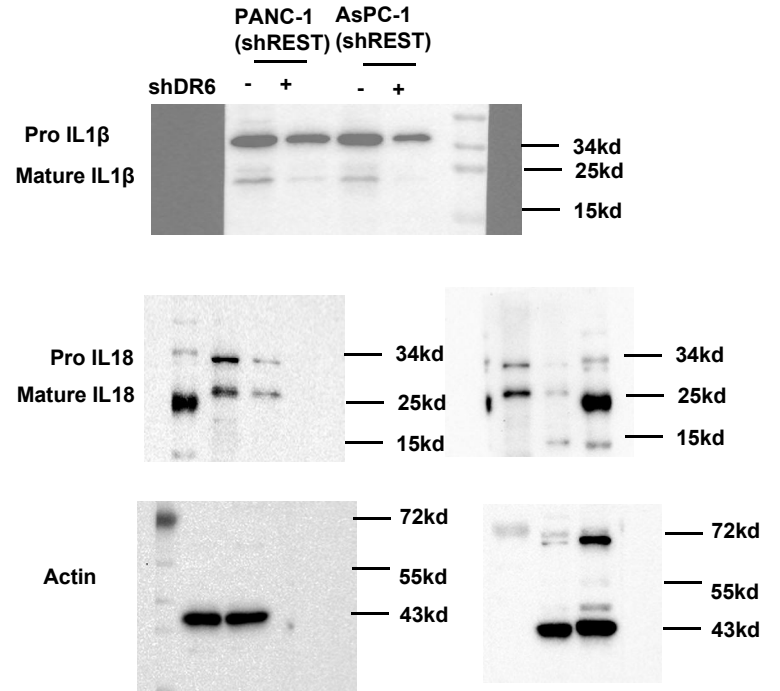

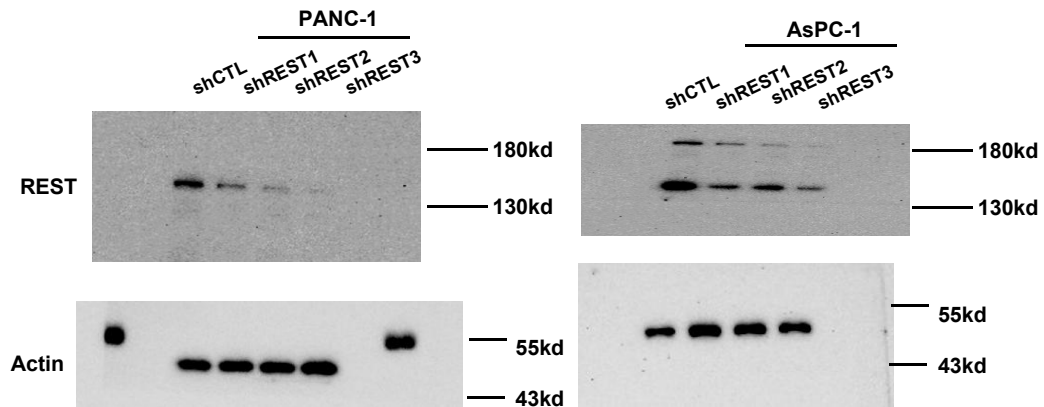

**PANC-1** **AsPC-1**

shCTL shREST shCTL shREST

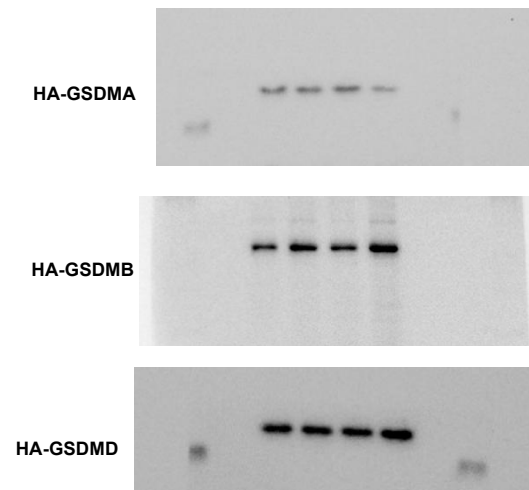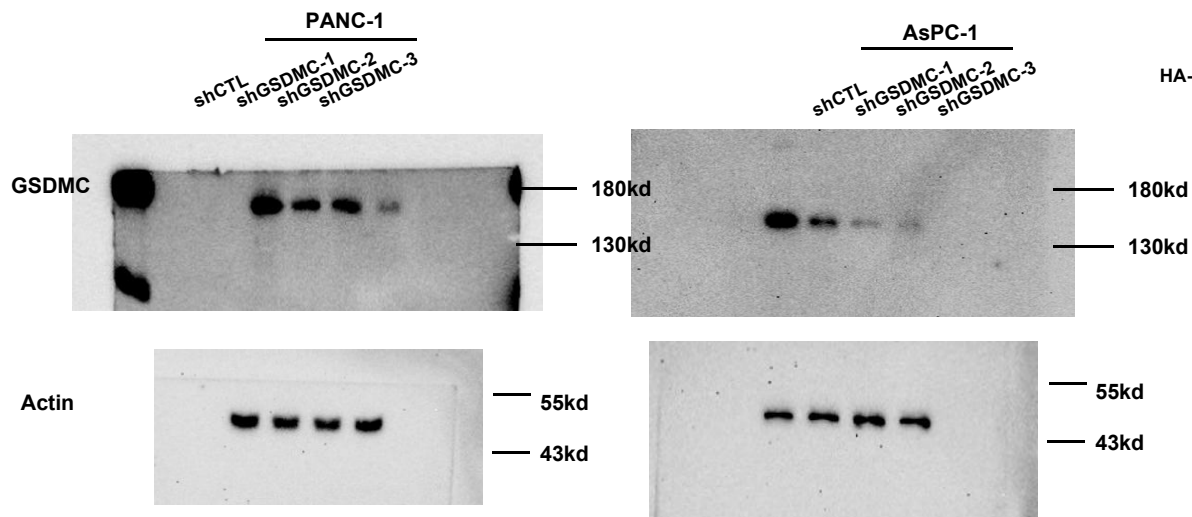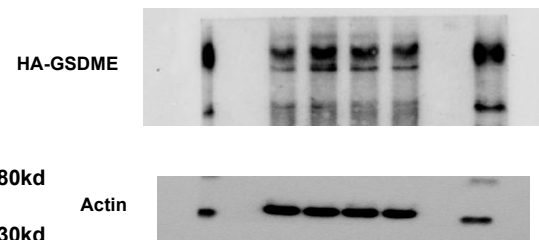

PANC-1

shREST-AAV8

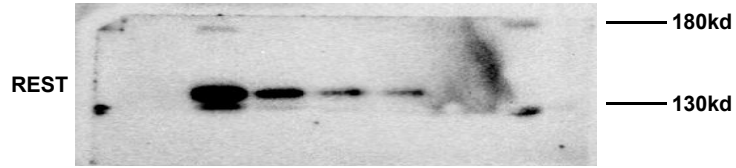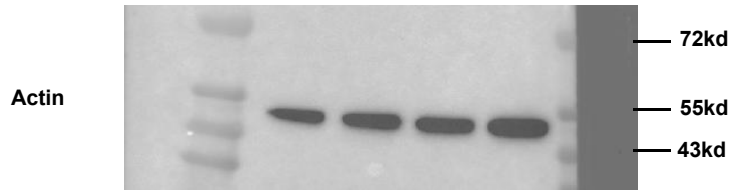

AsPC-1

shREST-AAV8

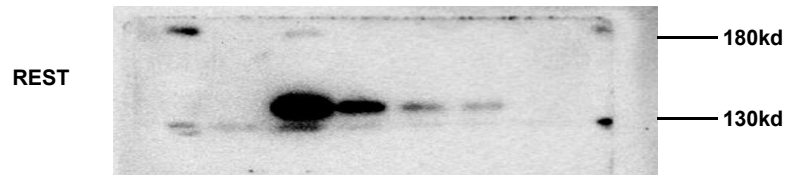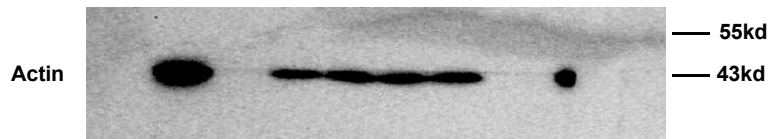

shREST-AAV8 CTRL-AAV8

Lung Spleen Colon Pancreas Lung Spleen Colon Pancreas Positive control

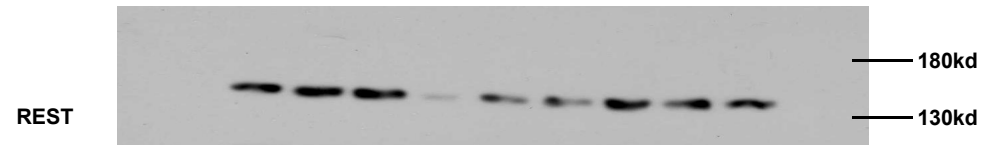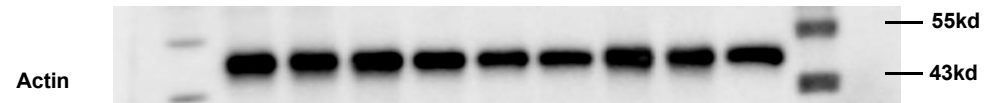

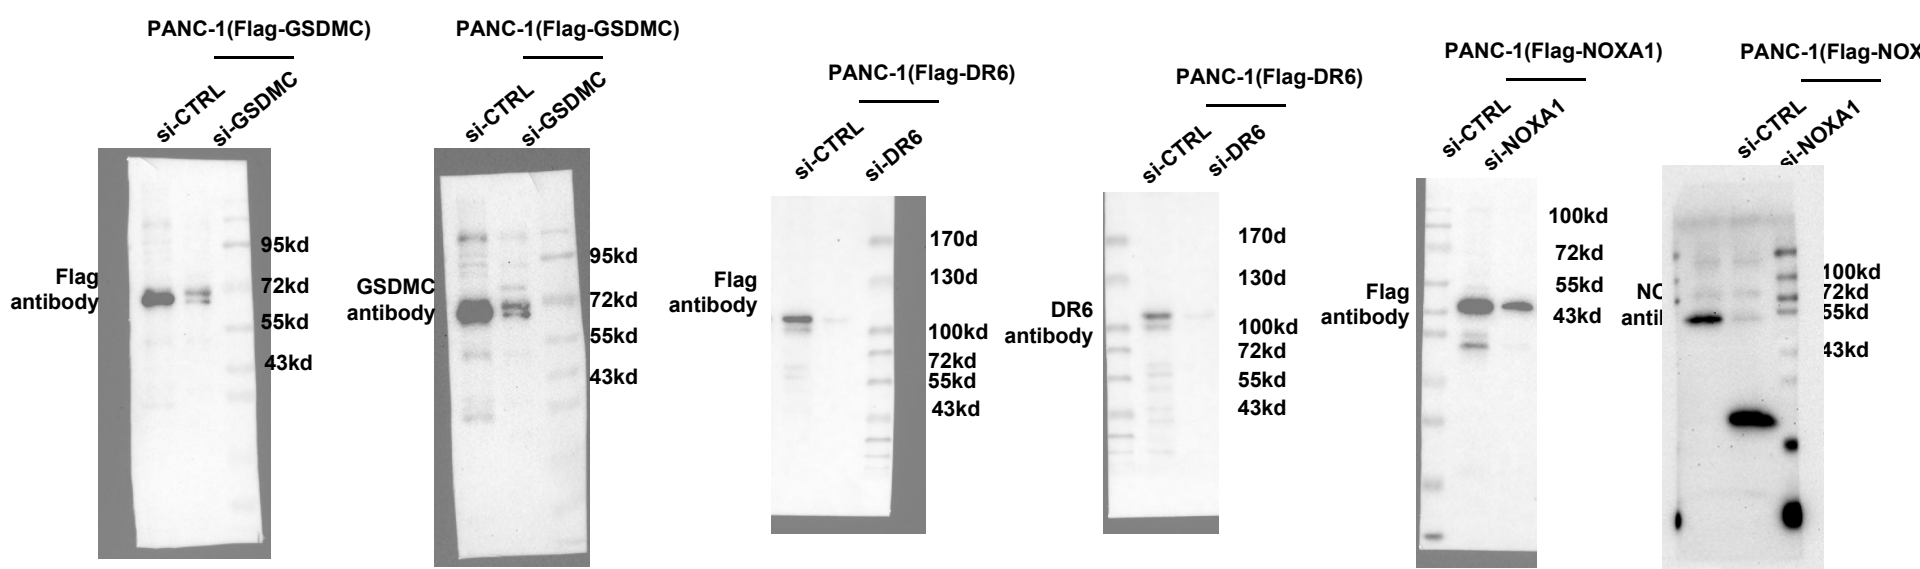

Supplement: Supplementary file 2 [file e5d82350db17f64fc7e1a045.pdf]
