# Supplementary material
Source: Research Square preprint supplement (doi:10.21203/rs.3.rs-9635765/v1)
Supplement: Supplementary file 1 [file e870851c01fb73f61ba77f50.xlsx]

## Sheet: antibody information
	Antibody information
	Name	Description	Cat No.	Company
	Actin		A2066	Sigma
	Flag-tag	M5	F4042	Sigma
	REST	EPR2346Y	Ab75785	Abcam
	Caspase-8		551244	BD Biosciences
	GSDMC		A14550	Abclonal
	GSDMA		ab230768	Abcam
	GSDMB		ab235540	Abcam
	GSDMD		ab219800	Abcam
	GSDME		ab215191	Abcam
	DR6		93026S	Cell Signaling
	NOXA1		ab222852	Abcam
	IL1b		ab254360	Abcam
	IL18		54943	Cell Signaling
