# Supplementary material
Source: Research Square preprint supplement (doi:10.21203/rs.3.rs-9635765/v1)
Supplement: Supplementary file 2 [file f574798e92f479edaae8ca73.xlsx]

## Sheet: Primer information
	Primers for realtime-qPCR	Sequences
	18s rRNA F:	TTGACGGAAGGGCACCACCAG
	18s rRNA R:	GCACCACCACCCACGGAATCG
	REST F:	TGCGTACTCATTCAGGTGAGA
	REST R:	TCTTGCATGGCGGGTTACTT
	REST(mouse)F:	GGCAGATGGCCGAATTGATG
	REST(mouse)R:	CTTTGAGGTCAGCCGACTCT
	NOXA1 F:	CTCTCTAGGGGATCAGATACGG
	NOXA1 R:	GTCACTGCTTGGTCAAATGCC
