# Supplementary material
Source: Research Square preprint supplement (doi:10.21203/rs.3.rs-9635765/v1)

PDAC

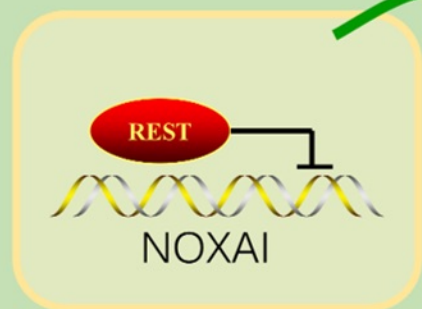

ROS

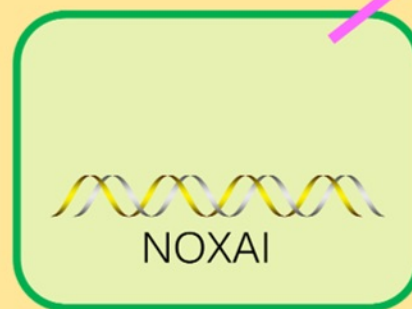

NOXAI

ROS

Oxi-DR6

GSDMC

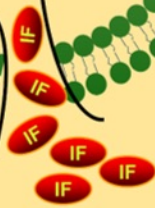

Proliferation

Pyroptosis

Supplement: Supplementary file 1 [file 18903780f5e0a48fcb0e3218.pdf]
